# Supplementary material for: The multi metal-resistant bacterium Cupriavidus metallidurans CH34 affects growth and metal mobilization in Arabidopsis thaliana plants exposed to copper
Source: PeerJ journal article supplement (doi:10.7717/peerj.11373), 2021-05-14

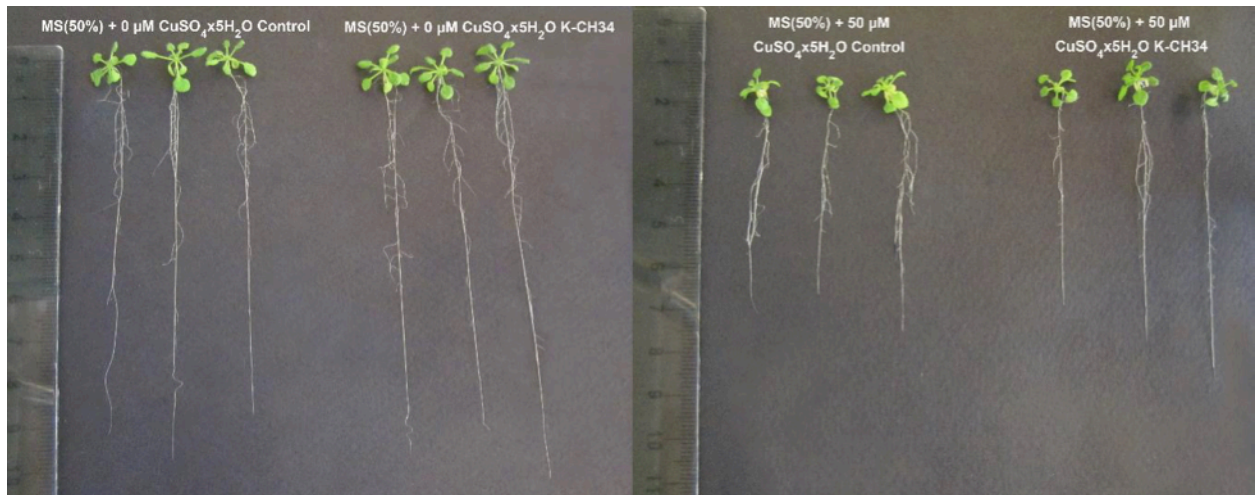

Supplement: BGSuppl1.pdf [file BGSuppl1.pdf]
