# Supplementary material for: The multi metal-resistant bacterium Cupriavidus metallidurans CH34 affects growth and metal mobilization in Arabidopsis thaliana plants exposed to copper
Source: PeerJ journal article supplement (doi:10.7717/peerj.11373), 2021-05-14
Supplement: BGSuppl2.pdf [file BGSuppl2.pdf]

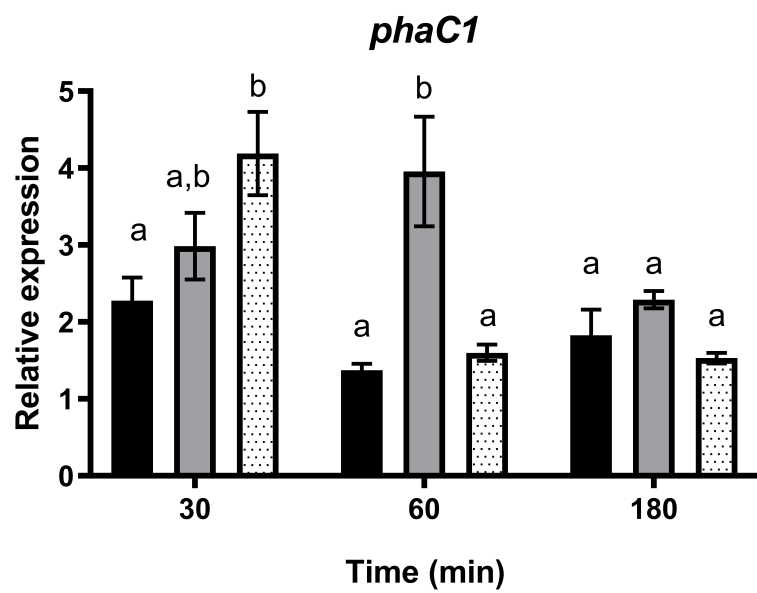

■ Plant + 25  $\mu\text{M}$   $\text{Cu}^{+2}$

■ Plant (At)

■ 25  $\mu\text{M}$   $\text{Cu}^{+2}$
