# Supplementary material for: The multi metal-resistant bacterium Cupriavidus metallidurans CH34 affects growth and metal mobilization in Arabidopsis thaliana plants exposed to copper
Source: PeerJ. 2021 May 14;9:e11373. doi: 10.7717/peerj.11373 (PMC8127957; doi:10.7717/peerj.11373)
Supplement: Supplemental Information 4 [file peerj-09-11373-s004.xlsx]

## Sheet: RG FW SR Without CH34
		0 CuSO4				25 CuSO4				50 CuSO4				60 CuSO4				70 CuSO4
	Plate	Root Growth (Cm)	Fresh Weigth (grams)	Number of Secondary Roots	Plate	Root Growth (Cm)	Fresh Weigth (grams)	Number of Secondary Roots	Plate	Root Growth (Cm)	Fresh Weigth (grams)	Number of Secondary Roots	Plate	Root Growth (Cm)	Fresh Weigth (grams)	Number of Secondary Roots	Plate	Root Growth (Cm)	Fresh Weigth (grams)
	1	8.5	0.019	34	1	7.1	0.0126	21	1	5.5	0.0071	20	1	2.1	0.0044	2	1	0.6	0.0028
	1	10.6	0.0188	15	1	7.3	0.0186	13	1	7.1	0.0103	19	1	1.7	0.0033	3	1	1.9	0.0036
	1	9.7	0.0182	30	1	8.5	0.0183	25	1	6.3	0.0087	13	1	2.2	0.0031	2	1	1.3	0.0039
	1	11.2	0.03	37	1	7.6	0.0125	19	1	6.8	0.0087	21	1	2.1	0.0027	3	1	1.2	0.0021
	1	11.1	0.022	21	1	8.2	0.0161	28	1	5.1	0.0059	20	1	2.1	0.0038	1	1	1	0.0037
	1	9.1	0.0112	27	1	7.2	0.0127	20	1	5.5	0.006	17	1	1.7	0.0037	1	1	0.5	0.0018
	1	9.6	0.022	33	1	7.2	0.0157	20	1	7.2	0.0086	14	1	1.9	0.0027	2	1	1	0.0029
	2	10.4	0.0178	25	2	7.6	0.0156	21	1	7.7	0.0097		2	3.5	0.0058	2	1	1.4	0.0043
	2	8.2	0.0188	32	2	7.3	0.0152	17	2	2.9	0.0059	20	2	1	0.0041	1	2	1	0.0015
	2	10.9	0.022	19	2	6.2	0.0149	17	2	6.8	0.0082	16	2	2	0.0038	1	2	0.7	0.0047
	2	6.6	0.0239	28	2	6.6	0.0135	22	2	7.1	0.00126	12	2	1	0.0051	2	2	1	0.0016
	2	7.2	0.014	43	2	7.1	0.0155	20	2	7.5	0.0084	13	2	2	0.0035	3	2	1.3	0.0057
	2	6.3	0.0084	29	2	7	0.0104	20	2	5.5	0.0094	12	2	1.6	0.0039	2	2	1	0.0044
	2	10.5	0.0177	26	2	7	0.0096	15	2	5.4	0.0132	17	2	2	0.0029	3	2	0.7	0.0048
	2	10.1	0.0127		2	7.9	0.0135	23	2	6.5	0.0081	15	3	1.8	0.005	1	2	0.9	0.0053
	3	4.7	0.008	37	3	7.4	0.0124		2	7	0.0088	7	3	1.6	0.0045	3	3	0.9	0.0038
	3	7.4	0.0278	41	3	8.5	0.0169		3	5.5	0.0081	14	3	1.9	0.0039	3	3	1	0.0031
	3	9.3	0.0181	33	3	8	0.0108		3	4.7	0.086	16	3	1.3	0.0037	3	3	0.7	0.0026
	3	11.1	0.0226	54	3	7.9	0.014		3	4.6	0.0079	7	3	2.3	0.0037	4	3	1	0.0042
	3	11.2	0.0233	34	3	8.9	0.0169		3	5.4	0.0062	9	3	2.3	0.0032	3	3	1	0.0036
	3	9.8	0.018	39	3	8.5	0.0134		3	5.2	0.0087	10	3	1.1	0.0025	2	3	1	0.0024
	3	9.4	0.0147	20	3	7.8	0.0114		3	4.6	0.0061	13	4	2.3	0.005	3	3	0.9	0.0033
					4	8.3	0.0152	19	3	6.6	0.0098	9	4	2.6	0.0054	2	3	0.5	0.0026
					4	4	0.0057	21	3	6	0.0089	10	4	1.7	0.0035	3	4	1	0.0028
					4	7.8	0.0124	29	4	3.3	0.0064	12	4	1.6	0.0036	2	4	1	0.0026
					4	5.3	0.0177	21	4	6.6	0.0086	11	4	1.8	0.0051	5	4	1.1	0.0034
					4	8.9	0.0141	15	4	5.9	0.0082	11	4	1.6	0.0033	6	4	1	0.003
					4	9.4	0.0292	23	4	5.2	0.0095	8	4	2.1	0.0036	5	4	0.7	0.0036
					4	7	0.009	7	4	5.8	0.0084	16	4	2.1	0.0044	5	4	0.9	0.0025
					4	7.7	0.0113	22	4	4.4	0.0115	11	5	1.4	0.0043	6	4	1.2	0.0037
					5	5.9	0.011		4	5.2	0.008	15	5	3.4	0.0065	5	5	0.5	0.0029
					5	5.8	0.0098		4	5.5	0.0056	3	5	1.9	0.0056	3	5	1	0.0038
					5	6.3	0.0122		5	4.3	0.007	9	5	1.5	0.0049	6	5	1	0.0032
					5	3.9	0.0071		5	4.8	0.0061	10	5	1.7	0.0045	5	5	0.9	0.0024
					5	6.9	0.0126		5	4.9	0.0069	10	5	1.6	0.005	5	5	1	0.0021
					5	6.9	0.0169		5	4.9	0.0053	11	5	1.7	0.0056	10	5	0.8	0.0021
					5	6.9	0.0119		5	5.1	0.0066	8	5	2.1	0.0053	3	5	1.7	0.0024
					5	7.2	0.013		5	4.9	0.0055	8
									5	4.6	0.0053	8
									5	4.8	0.0043	9

## Sheet: RG FW SR With CH34
		0 CuSO4				25 CuSO4				50 CuSO4				60 CuSO4				70 CuSO4
	Plate	Root Growth (Cm)	Fresh Weigth (grams)	Number of Secondary Roots	Plate	Root Growth (Cm)	Fresh Weigth (grams)	Number of Secondary Roots	Plate	Root Growth (Cm)	Fresh Weigth (grams)	Number of Secondary Roots	Plate	Root Growth (Cm)	Fresh Weigth (grams)	Number of Secondary Roots	Plate	Root Growth (Cm)	Fresh Weigth (grams)	Number of Secondary Roots
	1	13.5	0.0084	17	1	12.5	0.02	39	1	5	0.0079	14	1	1	0.0045	8	1	0	0.0009
	1	14.5	0.0136	17	1	11.9	0.0209	42	1	3.5	0.0039	7	1	1.9	0.0031	8	1	0	0.0007
	1	11.5	0.0128	19	1	11	0.016	27	1	4.5	0.0033	7	1	1.8	0.0021	6	1	0	0.0006
	1	13	0.0108	15	1	12.3	0.0242	34	1	6.5	0.00102	14	1	1	0.0022	6	1	0	0.0008
	1	12.5	0.0138	26	1	9.8	0.0131	25	1	4.4	0.0025	6	1	1.5	0.0053	6	1	0	0.0008
	1	10.8	0.0087	21	1	12.4	0.0197	42	1	4	0.0043	4	1	1.5	0.0036	7	1	0.2	0.0008
	1	9.5	0.0069	13	1	4	0.0058	7	1	3.1	0.0023	5	1	2.1	0.0025	8	1	0.6	0.0008
	1	9	0.008		1	11.3	0.0125	26	1	3.8	0.0026	5	1	1.9	0.003	9	1	0	0.0008
	2	8.5	0.014	39	2	10.7	0.0069	19	2	5	0.0042	6	2	1.3	0.0024	5	2	0	0.001
	2	11.5	0.0132	25	2	10.8	0.0073	16	2	6.8	0.0063	17	2	1	0.0026	3	2	0.2	0.001
	2	11.5	0.0176	36	2	11.2	0.0152	27	2	6.3	0.0031	6	2	0.7	0.0018	3	2	0.1	0.001
	2	12.5	0.0098	19	2	11.6	0.0089	20	2	6.3	0.0047	13	2	1.5	0.0018	1	2	0.5	0.001
	2	7.8	0.0056		2	12.8	0.0114	26	2	5.8	0.0028	15	2	0.5	0.0016	3	2	0	0.001
	2	12.5	0.0222		2	11.8	0.0078	18	2	4	0.0011	3	2	1.5	0.0024	3	2	0	0.001
	3	12.8	0.0173	22	2	11.5	0.0116	27	2	5.6	0.0026	8	2	1.5	0.0014	3	2	1	0.001
	3	13.5	0.0154	17	2	11.5	0.0122	18	2	5	0.0018	4	2	1	0.002	3	2	0.5	0.001
	3	14.5	0.0182	20	3	12	0.0108	20	3	4.5	0.0033	5	3	3	0.0048	13	3	0.5	0.0008
	3	8	0.0175	24	3	7.3	0.0028	8	3	3.3	0.0041	6	3	2	0.0031	8	3	0	0.0008
	3	13.2	0.0159	21	3	11.3	0.008	19	3	7.7	0.0069	12	3	1.5	0.0031	7	3	0.1	0.0008
	3	13.4	0.0152	21	3	12.8	0.011	18	3	7.6	0.006	17	3	1.5	0.0029	3	3	0	0.0008
	3	13.3	0.0148	25	3	12	0.0093	25	3	2.8	0.0017	3	3	1.1	0.002	2	3	0	0.0008
	3	13.3	0.023	23	3	12	0.0132	31	3	4.7	0.0027	7	3	2	0.0034	7	3	0	0.0008
	4	9.3	0.0214	26	3	11.3	0.0214	39	3	7.5	0.0084	16	3	2.4	0.0039	6	3	0	0.0008
	4	6.2	0.0325	28	3	11.9	0.0239	42	3	7.8	0.0062	19	3	2.5	0.0028	6	3	0	0.0008
	4	8	0.0204	25	4	10.7	0.0078	20	4	4.4	0.0029	6	4	1.3	0.002	5	4	0.4	0.007
	4	9.9	0.0188	25	4	12	0.0192	35	4	7	0.0077	18	4	1.2	0.0024	5	4	0.2	0.007
	4	15	0.019	22	4	11	0.0109	18	4	6.4	0.0029	10	4	1	0.0017	3	4	0	0.007
	4	11	0.0135	33	4	9.5	0.0071	7	4	5.9	0.0028	5	4	1.8	0.0025	4	4	0	0.008
	4	12.1	0.0142	32	4	11.7	0.0127	21	4	7.3	0.0041	16	4	3	0.0026	5	4	0	0.008
					4	11.6	0.0118	27	4	7.5	0.0076	18	4	1.7	0.002	6	4	0	0.008
					4	12	0.0106	22	4	6.4	0.0072	18	4	1.5	0.0041	6	4	0	0.008
									4	4.2	0.0035	10	5	1	0.0015	5
									5	4.5	0.0026	6	5	0.8	0.0027	5
									5	8.2	0.0056	14	5	1	0.0021	4
									5	4.9	0.0027	8	5	2	0.0058	10
									5	3.6	0.0016	6	5	0.8	0.0023	5
									5	9.1	0.0067	19	5	0.8	0.0035	5
									5	5.5	0.003	8	5	0.9	0.003
									5	7.7	0.0057	12

## Sheet: Dry Weight with & without CH34
WITHOUT CH34
Plate	0 CuSO4	Plate	25 CuSO4	Plate	50 CuSO4	Plate	60 CuSO4	Plate	70 CuSO4
1	0.0125	1	0.0093	1	0.0077	1	0.0027	1	0.0032
2	0.0115	2	0.0096	2	0.0075	2	0.0028	2	0.0032
3	0.0137	3	0.0088	3	0.0087	3	0.0042	3	0.0032
		4	0.0139	4	0.0049	4	0.0035	4	0.0028
		5	0.0085			5	0.0052	5	0.0029
WITH CH34
Plate	0 CuSO4	Plate	25 CuSO4	Plate	50 CuSO4	Plate	60 CuSO4	Plate	70 CuSO4
1	0.0075	1	0.0108	1	0.0036	1	0.0017	1	0.0005
2	0.008	2	0.0091	2	0.0027	2	0.0012	2	0.0006
3	0.0113	3	0.0047	3	0.0037	3	0.0018	3	0.0004
4	0.00122	4	0.0053	4	0.004	4	0.0013	4	7e-05
		5	0.0076	5	0.0026	5	0.002

## Sheet: Rosette Area Without CH34
		0 CuSo4					25 CuSO4					50 CuSO4					60 CuSO4					70 CuSO4
	Plate	Pixel Count Coin	Pixel count Rosette	Coin Area cm2	Rosette Area Cm2	Plate	Pixel Count Coin	Pixel count Rosette	Coin Area cm2	Rosette Area Cm2	Plate	Pixel Count Coin	Pixel count Rosette	Coin Area cm2	Rosette Area Cm2	Plate	Pixel Count Coin	Pixel count Rosette	Coin Area cm2	Rosette Area Cm2	Plate	Pixel Count Coin	Pixel count Rosette	Coin Area cm2	Rosette Area Cm2
	1	256844	51899	4.155	0.839577	1	272826	42101	4.155	0.641177	1	275710	30365	4.155	0.457606	1	275411	11005	4.155	0.166027	1	281683	16625	4.155	0.245229
	1	256844	34687	4.155	0.561136	1	272826	42574	4.155	0.64838	1	275710	30771	4.155	0.463725	1	275411	17603	4.155	0.265568	1	281683	13340	4.155	0.196773
	1	256844	55570	4.155	0.898963	1	272826	47208	4.155	0.718954	1	275710	15861	4.155	0.239028	1	275411	13563	4.155	0.204619	1	281683	8330	4.155	0.122873
	1	256844	60161	4.155	0.973233	1	272826	40143	4.155	0.611357	1	275710	20534	4.155	0.309451	1	275411	10482	4.155	0.158137	1	281683	15094	4.155	0.222646
	1	256844	50658	4.155	0.819501	1	272826	47854	4.155	0.728792	1	275710	38767	4.155	0.584226	1	275411	16983	4.155	0.256215	1	281683	9527	4.155	0.140529
	1	256844	71746	4.155	1.16064	1	272826	60190	4.155	0.916663	1	275710	31636	4.155	0.47676	1	275411	16750	4.155	0.2527	1	281683	16649	4.155	0.245583
	1	256844	51625	4.155	0.835145	1	272826	35836	4.155	0.545764	1	275710	31431	4.155	0.473671	1	275411	12870	4.155	0.194164	1	281683	12033	4.155	0.177494
	2	256585	43834	4.155	0.709824	2	271797	40859	4.155	0.624617	1	275710	27693	4.155	0.417339	2	278105	17981	4.155	0.268643	1	281683	13054	4.155	0.192555
	2	256585	55751	4.155	0.902802	2	271797	31174	4.155	0.476561	2	275878	32110	4.155	0.483609	2	278105	20593	4.155	0.307668	2	275231	13116	4.155	0.198005
	2	256585	51879	4.155	0.840101	2	271797	32859	4.155	0.50232	2	275878	35251	4.155	0.530915	2	278105	19026	4.155	0.284256	2	275231	19454	4.155	0.293686
	2	256585	40145	4.155	0.650087	2	271797	46013	4.155	0.703407	2	275878	44218	4.155	0.665968	2	278105	19817	4.155	0.296074	2	275231	20617	4.155	0.311243
	2	256585	54293	4.155	0.879192	2	271797	50220	4.155	0.76772	2	275878	27833	4.155	0.419193	2	278105	13724	4.155	0.205042	2	275231	22779	4.155	0.343881
	2	256585	44466	4.155	0.720059	2	271797	44797	4.155	0.684818	2	275878	35635	4.155	0.536699	2	278105	15754	4.155	0.235371	2	275231	7769	4.155	0.117284
	2	256585	54120	4.155	0.87639	2	271797	45500	4.155	0.695565	2	275878	33905	4.155	0.510643	2	278105	19444	4.155	0.290501	2	275231	19726	4.155	0.297792
	2	256585	47894	4.155	0.77557	2	271797	69619	4.155	1.06428	2	275878	21218	4.155	0.319564	3	276697	11137	4.155	0.167238	2	275231	7450	4.155	0.112468
	3	266860	46755	4.155	0.727974	3	270571	33294	4.155	0.511276	2	275878	24026	4.155	0.361856	3	276697	16879	4.155	0.253462	3	272389	15642	4.155	0.238602
	3	266860	44056	4.155	0.68595	3	270571	24157	4.155	0.370965	3	268863	22664	4.155	0.350249	3	276697	16435	4.155	0.246795	3	272389	10502	4.155	0.160197
	3	266860	69737	4.155	1.0858	3	270571	51491	4.155	0.790717	3	268863	29152	4.155	0.450514	3	276697	16336	4.155	0.245308	3	272389	8932	4.155	0.136248
	3	266860	53323	4.155	0.830237	3	270571	43016	4.155	0.660571	3	268863	30673	4.155	0.47402	3	276697	24132	4.155	0.362376	3	272389	14822	4.155	0.226094
	3	266860	58849	4.155	0.916277	3	270571	31123	4.155	0.477938	3	268863	20909	4.155	0.323127	3	276697	16561	4.155	0.248687	3	272389	12336	4.155	0.188172
	3	266860	48499	4.155	0.755128	3	270571	48768	4.155	0.748902	3	268863	17776	4.155	0.27471	3	276697	18824	4.155	0.282669	3	272389	14041	4.155	0.21418
	3	266860	63429	4.155	0.987587	3	270571	36785	4.155	0.564886	3	268863	18620	4.155	0.287753	3	276697	15967	4.155	0.239767	3	272389	15702	4.155	0.239517
	3	266860	22852	4.155	0.355805	4	277733	37929	4.155	0.567433	3	268863	36530	4.155	0.564533	4	277121	16212	4.155	0.243074	3	272389	9101	4.155	0.138826
						4	277733	34515	4.155	0.516359	3	268863	19872	4.155	0.307101	4	277121	15562	4.155	0.233328	4	275776	16819	4.155	0.253405
		0.839577	51899			4	277733	82427	4.155	1.23314	4	268960	29872	4.155	0.461474	4	277121	20366	4.155	0.305357	4	275776	11255	4.155	0.169574
		4.155	256844			4	277733	25023	4.155	0.374354	4	268960	17889	4.155	0.276356	4	277121	20650	4.155	0.309615	4	275776	15537	4.155	0.234089
		0.561136	34687			4	277733	65959	4.155	0.986774	4	268960	40754	4.155	0.629584	4	277121	13785	4.155	0.206685	4	275776	9366	4.155	0.141114
		4.155	256844			4	277733	39658	4.155	0.5933	4	268960	20217	4.155	0.31232	4	277121	16925	4.155	0.253764	4	275776	13560	4.155	0.204303
		0.898963	55570			4	277733	18173	4.155	0.271876	4	268960	36252	4.155	0.560035	4	277121	22841	4.155	0.342465	4	275776	12736	4.155	0.191888
		4.155	256844			4	277733	54712	4.155	0.818514	4	268960	29673	4.155	0.4584	4	277121	21722	4.155	0.325688	4	275776	9629	4.155	0.145076
						5	278246	41066	4.155	0.613232	4	268960	27866	4.155	0.430485	5	272665	20573	4.155	0.313501	5	272765	11293	4.155	0.172025
						5	278246	39847	4.155	0.595028	4	268960	23465	4.155	0.362497	5	272665	23300	4.155	0.355057	5	272765	16165	4.155	0.24624
						5	278246	44644	4.155	0.666661	5	273369	18723	4.155	0.284575	5	272665	13527	4.155	0.206131	5	272765	14068	4.155	0.214296
						5	278246	38293	4.155	0.571823	5	273369	13339	4.155	0.202743	5	272665	21553	4.155	0.328435	5	272765	12975	4.155	0.197647
						5	278246	23428	4.155	0.349846	5	273369	21230	4.155	0.32268	5	272665	22198	4.155	0.338264	5	272765	12163	4.155	0.185278
						5	278246	42361	4.155	0.63257	5	273369	30010	4.155	0.456129	5	272665	26237	4.155	0.399812	5	272765	16847	4.155	0.256629
						5	278246	29889	4.155	0.446327	5	273369	22589	4.155	0.343336	5	272665	31419	4.155	0.478778	5	272765	17062	4.155	0.259904
						5	278246	47081	4.155	0.703053	5	273369	20652	4.155	0.313895	5	272665	22160	4.155	0.337685
											5	273369	16618	4.155	0.252581
											5	273369	17790	4.155	0.270394

## Sheet: Rosette Area With CH34
		0 CuSo4					25 CuSO4					50 CuSO4					60 CuSO4					70 CuSO4
	Plate	Pixel Count Coin	Pixel count Rosette	Coin Area cm2	Rosette Area Cm2	Plate	Pixel Count Coin	Pixel count Rosette	Coin Area cm2	Rosette Area Cm2	Plate	Pixel Count Coin	Pixel count Rosette	Coin Area cm2	Rosette Area Cm2	Plate	Pixel Count Coin	Pixel count Rosette	Coin Area cm2	Rosette Area Cm2	Plate	Pixel Count Coin	Pixel count Rosette	Coin Area cm2	Rosette Area Cm2
	1	251642	38092	4.155	0.628958	1	256168	32581	4.155	0.528458	1	255676	8257	4.155	0.134185	1	259317	5016	4.155	0.0803707	1	254773	2110	4.155	0.0344112
	1	251642	26898	4.155	0.444128	1	256168	30778	4.155	0.499214	1	255676	5613	4.155	0.0912171	1	259317	5348	4.155	0.0856903	1	254773	2151	4.155	0.0350799
	1	251642	39027	4.155	0.644396	1	256168	72305	4.155	1.17277	1	255676	10093	4.155	0.164022	1	259317	7021	4.155	0.112496	1	254773	1859	4.155	0.0303178
	1	251642	52409	4.155	0.865354	1	256168	55042	4.155	0.892772	1	255676	10479	4.155	0.170295	1	259317	8608	4.155	0.137925	1	254773	2629	4.155	0.0428754
	1	251642	43444	4.155	0.717328	1	256168	87261	4.155	1.41536	1	255676	28995	4.155	0.471199	1	259317	7112	4.155	0.113955	1	254773	2991	4.155	0.0487791
	1	251642	35085	4.155	0.579308	1	256168	49915	4.155	0.809613	1	255676	12514	4.155	0.203365	1	259317	4964	4.155	0.0795375	1	254773	3144	4.155	0.0512743
	1	251642	56373	4.155	0.930806	1	256168	88848	4.155	1.4411	1	255676	7806	4.155	0.126856	1	259317	6887	4.155	0.110349	1	254773	3670	4.155	0.0598527
	1	251642	34858	4.155	0.57556	1	256168	81873	4.155	1.32797	1	255676	16840	4.155	0.273667	1	259317	8220	4.155	0.131708	1	254773	1977	4.155	0.0322422
	2	254569	71302	4.155	1.16377	2	259386	50000	4.155	0.80093	2	261028	5428	4.155	0.086402	2	258256	5417	4.155	0.0871524	2	253436	1857	4.155	0.0304449
	2	254569	26113	4.155	0.426209	2	259386	58720	4.155	0.940612	2	261028	8239	4.155	0.131147	2	258256	4190	4.155	0.0674116	2	253436	3878	4.155	0.0635785
	2	254569	43990	4.155	0.717992	2	259386	29972	4.155	0.480109	2	261028	3949	4.155	0.0628595	2	258256	6619	4.155	0.106491	2	253436	2985	4.155	0.0489381
	2	254569	79642	4.155	1.29989	2	259386	52078	4.155	0.834217	2	261028	8743	4.155	0.13917	2	258256	4073	4.155	0.0655292	2	253436	2855	4.155	0.0468068
	2	254569	34016	4.155	0.555199	2	259386	30537	4.155	0.48916	2	261028	23132	4.155	0.368211	2	258256	5517	4.155	0.0887613	2	253436	4216	4.155	0.0691199
	2	254569	46158	4.155	0.753377	2	259386	69585	4.155	1.11465	2	261028	8856	4.155	0.140968	2	258256	4702	4.155	0.075649	2	253436	3181	4.155	0.0521514
	2	254569	51144	4.155	0.834757	2	259386	35110	4.155	0.562413	2	261028	15368	4.155	0.244625	2	258256	7725	4.155	0.124285	2	253436	4432	4.155	0.0726612
	3	258779	67025	4.155	1.07616	2	259386	32238	4.155	0.516408	2	261028	8802	4.155	0.140109	2	258256	6757	4.155	0.108711	2	253436	4996	4.155	0.0819078
	3	258779	63926	4.155	1.02641	3	256113	100811	4.155	1.63549	3	256269	15413	4.155	0.249898	3	256183	6632	4.155	0.107564	3	255747	3299	4.155	0.0535973
	3	258779	68261	4.155	1.09601	3	256113	49015	4.155	0.795185	3	256269	21343	4.155	0.346043	3	256183	8889	4.155	0.14417	3	255747	3270	4.155	0.0531261
	3	258779	52439	4.155	0.84197	3	256113	43975	4.155	0.71342	3	256269	7096	4.155	0.115051	3	256183	8887	4.155	0.144137	3	255747	2517	4.155	0.0408925
	3	258779	67823	4.155	1.08898	3	256113	40285	4.155	0.653556	3	256269	5055	4.155	0.0819589	3	256183	5267	4.155	0.0854248	3	255747	2894	4.155	0.0470174
	3	258779	91617	4.155	1.47102	3	256113	19959	4.155	0.323801	3	256269	16606	4.155	0.26924	3	256183	5037	4.155	0.0816945	3	255747	2127	4.155	0.0345564
	3	258779	50636	4.155	0.81302	3	256113	19434	4.155	0.315284	3	256269	21227	4.155	0.344163	3	256183	7757	4.155	0.12581	3	255747	2524	4.155	0.0410062
	3	258779	47145	4.155	0.756968	3	256113	41989	4.155	0.6812	3	256269	8039	4.155	0.13034	3	256183	6349	4.155	0.102974	3	255747	2615	4.155	0.0424847
	4	250318	56875	4.155	0.944062	4	254692	22967	4.155	0.37468	3	256269	8172	4.155	0.132496	3	256183	13650	4.155	0.221388	3	255747	3202	4.155	0.0520214
	4	250318	71342	4.155	1.1842	4	254692	31061	4.155	0.506724	4	254146	11404	4.155	0.186443	4	254049	8467	4.155	0.138479	4	255177	5940	4.155	0.0967199
	4	250318	76495	4.155	1.26973	4	254692	32076	4.155	0.523282	4	254146	7923	4.155	0.129532	4	254049	6511	4.155	0.106488	4	255177	3355	4.155	0.0546288
	4	250318	68777	4.155	1.14162	4	254692	39537	4.155	0.645	4	254146	31733	4.155	0.518799	4	254049	8532	4.155	0.139542	4	255177	3181	4.155	0.0517956
	4	250318	71380	4.155	1.18483	4	254692	23735	4.155	0.387209	4	254146	7512	4.155	0.122813	4	254049	5740	4.155	0.0938783	4	255177	3601	4.155	0.0586344
	4	250318	59982	4.155	0.995634	4	254692	40571	4.155	0.661868	4	254146	9437	4.155	0.154284	4	254049	2643	4.155	0.0432266	4	255177	2156	4.155	0.0351057
	4	250318	64605	4.155	1.07237	4	254692	79724	4.155	1.3006	4	254146	21921	4.155	0.358384	4	254049	5903	4.155	0.0965442	4	255177	3668	4.155	0.0597254
	4	250318	49372	4.155	0.81952	4	254692	40226	4.155	0.65624	4	254146	10485	4.155	0.171418	4	254049	4546	4.155	0.0743503	4	255177	3231	4.155	0.0526098
																5	254881	5070	4.155	0.0826497
																5	254881	7612	4.155	0.124089
																5	254881	5487	4.155	0.0894476
																5	254881	16535	4.155	0.269549
																5	254881	5806	4.155	0.0946478
																5	254881	6893	4.155	0.112368
																5	254881	6763	4.155	0.110249

## Sheet:  Statistical Analysis
	Parameter	Between groups (w/o CH34 vs w/ CH34)	p-value	Within groups w/o CH34	p-value	Within Groups (w/ CH34)	p-value
	Root Growth	0 CuSO4 w/o CH34 - 0 CuSo4 w/ CH34	0.001116	0 CuSO4 w/o CH34 - 25 CuSO4 w/o CH34	9.02e-07	0 CuSO4 w/ CH34 - 25 CuSO4 w/ CH34	0.9251
		25 CuSO4 w/o CH34 - 25 CuSO4 w/ CH34	2.2e-16	25 CuSO4 w/o CH34 - 50 CuSO4 w/o CH34	5.419e-12	25 CuSO4 w/ CH34 - 50 CuSO4 w/ CH34	< 2.2e-16
		50 CuSO4 w/o CH34 - 50 CusO4 w/ CH34	0.001515	50 CuSO4 w/o CH34 - 60 CuSO4 w/o CH34	2.2e-16	50 CuSO4 w/ CH34 - 60 CuSO4 w/ CH34	< 2.2e-16
		60 CuSO4 w/o CH34 - 50 CusO4 w/ CH34	0.004005	60 CuSO4 w/o CH34 - 70 CuSO4 w/o CH34	5.817e-11	60 CuSO4 w/ CH34 - 70 CuSO4 w/ CH34	< 2.2e-16
		70 CusO4 w/o CH34 - 70 CusO4 w/ CH34	2.2e-16
	Fresh Weight	0 CuSO4 w/o CH34 - 0 CuSo4 w/ CH34	0.01763	0 CuSO4 w/o CH34 - 25 CuSO4 w/o CH34	0.09191	0 CuSO4 w/ CH34 - 25 CuSO4 w/ CH34	0.06318
		25 CuSO4 w/o CH34 - 25 CuSO4 w/ CH34	0.6255	25 CuSO4 w/o CH34 - 50 CuSO4 w/o CH34	4.214e-11	25 CuSO4 w/ CH34 - 50 CuSO4 w/ CH34	6.06e-10
		50 CuSO4 w/o CH34 - 50 CusO4 w/ CH34	1.468e-09	50 CuSO4 w/o CH34 - 60 CuSO4 w/o CH34	< 2.2e-16	50 CuSO4 w/ CH34 - 60 CuSO4 w/ CH34	0.002615
		60 CuSO4 w/o CH34 - 50 CusO4 w/ CH34	9.366e-05	60 CuSO4 w/o CH34 - 70 CuSO4 w/o CH34	0.08126	60 CuSO4 w/ CH34 - 70 CuSO4 w/ CH34	5.052e-11
		70 CusO4 w/o CH34 - 70 CusO4 w/ CH34	< 2.2e-16
	Dry Weight	0 CuSO4 w/o CH34 - 0 CuSo4 w/ CH34	0.04584	0 CuSO4 w/o CH34 - 25 CuSO4 w/o CH34	0.0825	0 CuSO4 w/ CH34 - 25 CuSO4 w/ CH34	0.0294
		25 CuSO4 w/o CH34 - 25 CuSO4 w/ CH34	0.2126	25 CuSO4 w/o CH34 - 50 CuSO4 w/o CH34	0.003823	25 CuSO4 w/ CH34 - 50 CuSO4 w/ CH34	0.0005169
		50 CuSO4 w/o CH34 - 50 CusO4 w/ CH34	0.03881	50 CuSO4 w/o CH34 - 60 CuSO4 w/o CH34	0.001519	50 CuSO4 w/ CH34 - 60 CuSO4 w/ CH34	0.7246
		60 CuSO4 w/o CH34 - 50 CusO4 w/ CH34	0.9781	60 CuSO4 w/o CH34 - 70 CuSO4 w/o CH34	0.6064	60 CuSO4 w/ CH34 - 70 CuSO4 w/ CH34	0.01287
		70 CusO4 w/o CH34 - 70 CusO4 w/ CH34	0.001497
	Rosette Area	0 CuSO4 w/o CH34 - 0 CuSo4 w/ CH34	0.1637	0 CuSO4 w/o CH34 - 25 CuSO4 w/o CH34	0.0005251	0 CuSO4 w/ CH34 - 25 CuSO4 w/ CH34	0.108
		25 CuSO4 w/o CH34 - 25 CuSO4 w/ CH34	0.05346	25 CuSO4 w/o CH34 - 50 CuSO4 w/o CH34	1.575e-05	25 CuSO4 w/ CH34 - 50 CuSO4 w/ CH34	1.068e-07
		50 CuSO4 w/o CH34 - 50 CusO4 w/ CH34	9.616e-09	50 CuSO4 w/o CH34 - 60 CuSO4 w/o CH34	5.182e-05	50 CuSO4 w/ CH34 - 60 CuSO4 w/ CH34	0.000182
		60 CuSO4 w/o CH34 - 50 CusO4 w/ CH34	< 2.2e-16	60 CuSO4 w/o CH34 - 70 CuSO4 w/o CH34	0.01105	60 CuSO4 w/ CH34 - 70 CuSO4 w/ CH34	8.329e-08
		70 CusO4 w/o CH34 - 70 CusO4 w/ CH34	< 2.2e-16
