# Supplementary material for: The multi metal-resistant bacterium Cupriavidus metallidurans CH34 affects growth and metal mobilization in Arabidopsis thaliana plants exposed to copper
Source: PeerJ. 2021 May 14;9:e11373. doi: 10.7717/peerj.11373 (PMC8127957; doi:10.7717/peerj.11373)
Supplement: Supplemental Information 5 [file peerj-09-11373-s005.xlsx]

## Sheet: Tables 2 & 4
																				Table 4 MS 1/2 + 50uM Cu+2
			Table 2 MS 0.5 + 50uM Cu+2										Table 4 MS 0.5 + 50uM Cu+2							Rosette
			Rosette	Average	STD	Roots	Average	STD					Translocation Factor 1	Translocation Factor 2	Translocation Factor 3	Average				B	Co	Cu	Fe	Mn	Mo	Zn			TF control	TF CH34
	without CH34	B	41.978	43.956	3.36642	46.297	70.1033	23.353			Without CH34	B	0.906711	0.45224	0.673485	0.677478			w/o CH34	43.9565	0.330858	186.933	445.019	262.64	14.3396	295.68		B	0.627017	0.967016
		B	42.047			92.975													w/ CH34	57.2764	0.459749	289.026	484.055	350.362	23.0064	359.219		Co	0.589074	0.473901
		B	47.843			71.038													w/o / w/	1.30303	1.38957	1.54615	1.08772	1.334	1.60439	1.21489		Cu	0.605904	0.67808
		Co	0.323	0.330667	0.0070946	0.664	0.561333	0.0892711				Co	0.486446	0.640927	0.671315	0.599562				Root								Fe	0.0400994	0.0633943
		Co	0.332			0.518														B	Co	Cu	Fe	Mn	Mo	Zn		Mn	1.48307	1.79508
		Co	0.337			0.502													w/o CH34	70.1035	0.561698	308.519	11097.9	177.093	21.3278	1222.84		Mo	0.67235	0.657274
		Cu	180.374	186.933	6.13634	307.754	308.519	13.765				Cu	0.586098	0.596725	0.636588	0.606471			w/ CH34	59.2307	0.970474	426.242	7636.66	195.18	35.0027	2091.84		Zn	0.241798	0.171724
		Cu	192.534			295.153													w/o / w/	0.844903	1.72775	1.38158	0.688118	1.10213	1.64117	1.71064
		Cu	187.891			322.651
		Fe	412.919	445.019	34.3917	10869.8	11097.9	336.859				Fe	0.0379878	0.0402976	0.041909	0.0400648
		Fe	440.821			10939.1
		Fe	481.317			11484.8
		Mn	244.901	262.64	15.3721	166.358	177.093	9.73475				Mn	1.47213	1.50894	1.46781	1.48296
		Mn	270.963			179.572
		Mn	272.056			185.348
		Mo	14.116	14.3397	0.39784	25.953	21.3277	4.12237				Mo	0.543906	0.781775	0.740357	0.688679
		Mo	14.104			18.041
		Mo	14.799			19.989
		Zn	288.916	295.68	15.1291	1180.07	1222.84	46.6945				Zn	0.24483	0.234508	0.245951	0.241763
		Zn	285.113			1215.79
		Zn	313.011			1272.66
			Rosette	Average	STD	Roots	Average	STD					tf1	tf2	tf3	Average
	With CH34	B	62.475	57.2767	5.31831	82.577	59.2303	23.8893			With CH34	B	0.756567	0.860072	1.65099	1.08921
		B	51.846			60.281
		B	57.509			34.833
		Co	0.461	0.46	0.0135277	1.094	0.970667	0.134656				Co	0.421389	0.539299	0.477296	0.479328
		Co	0.446			0.827
		Co	0.473			0.991
		Cu	287.478	289.026	1.35625	443.009	426.242	19.9542				Cu	0.648921	0.672013	0.716519	0.679151
		Cu	290.004			431.545
		Cu	289.597			404.172
		Fe	472.918	484.121	11.5309	7996.49	7636.66	377.725				Fe	0.0591407	0.063035	0.0684709	0.0635488
		Fe	483.492			7670.22
		Fe	495.954			7243.28
		Mn	343.601	350.362	7.20835	195.194	195.179	12.204				Mn	1.76031	1.68553	1.95634	1.80072
		Mn	349.539			207.376
		Mn	357.947			182.968
		Mo	23.763	23.0063	1.15162	36.114	35.0027	1.6175				Mo	0.658	0.659496	0.654086	0.657194
		Mo	23.575			35.747
		Mo	21.681			33.147
		Zn	357.675	359.218	1.47548	2183.15	2091.84	107.844				Zn	0.163834	0.169551	0.182788	0.172058
		Zn	359.365			2119.51
		Zn	360.615			1972.86
													Translocation factor MS 0.5 + 50uM Cu+2
													B	Co	Cu	Fe	Mn	Mo	Zn
			Table 2 MS 0.5 + 0 uM Cu+2									w/o CH34	0.677484	0.59951	0.606472	0.0400648	1.48296	0.688673	0.241763
			Rosette	Average	STD	Roots	Average	STD				w/ CH34	1.0892	0.479131	0.679151	0.0635402	1.80072	0.657197	0.172058
	without CH34	B	21.792	21.017	0.704613	16.278	14.6427	1.82057					1.60771	0.799205	1.11984	1.58593	1.21428	0.954294	0.711681
		B	20.415			14.969							P = 0,257	P = 0,145	P = 0,033	P = 0,001	P = 0,018	P = 0,690	P = <0,001
		B	20.844			12.681
		Co	0.239	0.224333	0.0136504	0.631	0.537333	0.0829839
		Co	0.222			0.508
		Co	0.212			0.473
		Cu	4.491	4.46767	0.0728583	5.465	5.21667	0.219619
		Cu	4.386			5.137
		Cu	4.526			5.048
		Fe	112.057	118.032	5.18279	2453.88	2671.18	267.923
		Fe	120.721			2589.13
		Fe	121.317			2970.53
		Mn	186.418	196.525	8.91373	115.623	111.319	8.84328
		Mn	199.891			117.187
		Mn	203.265			101.148
		Mo	19.016	19.5397	0.496665	72.003	66.0733	7.21599
		Mo	20.004			58.039
		Mo	19.599			68.178
		Zn	171.902	191.409	18.1547	981.046	940.403	58.7578
		Zn	194.513			967.131
		Zn	207.811			873.033
			Rosette	Average	STD	Roots	Average	STD
	With CH34	B	29.981	27.522	2.16506	20.373	19.3333	0.923309
		B	25.902			18.609
		B	26.683			19.018
		Co	0.329	0.330333	0.0330202	0.927	0.943667	0.0246644
		Co	0.364			0.932
		Co	0.298			0.972
		Cu	4.929	4.688	0.229523	6.406	6.24333	0.201448
		Cu	4.472			6.018
		Cu	4.663			6.306
		Fe	167.341	167.926	8.90441	4904.72	5091.58	181.176
		Fe	177.108			5266.48
		Fe	159.328			5103.54
		Mn	205.526	217.725	12.1237	158.429	163.066	4.35236
		Mn	229.772			163.705
		Mn	217.878			167.063
		Mo	20.225	18.3673	2.15545	27.959	25.778	4.68785
		Mo	16.004			28.978
		Mo	18.873			20.397
		Zn	207.243	191.75	14.7366	1247.49	1299.18	56.2424
		Zn	177.909			1359.08
		Zn	190.098			1290.97
