# Supplementary material for: The multi metal-resistant bacterium Cupriavidus metallidurans CH34 affects growth and metal mobilization in Arabidopsis thaliana plants exposed to copper
Source: PeerJ. 2021 May 14;9:e11373. doi: 10.7717/peerj.11373 (PMC8127957; doi:10.7717/peerj.11373)
Supplement: Supplemental Information 7 [file peerj-09-11373-s007.xlsx]

## Sheet: CFU
	Treatment	Weight (g)	Count	Count	Count	Dilution	cfu/ml 1	cfu/ml 2	cfu/ml 3	Average	AVG/weight	AVG/Plate	Average	STD
	Plant MS(1/2)	0.0144	5	7	7	3	833333	1.16667e+06	1.16667e+06	1.05556e+06	7.33025e+07	2.43825e+08	5.77609e+08	4.65596e+08
		0.0087	7	3	5	3	1.16667e+06	500000	833333	833333	9.57854e+07
		0.0093	1	5	-	3	166667	833333		500000	5.37634e+07
		0.0135	5	6	5	4	8.33333e+06	10000000	8.33333e+06	8.88889e+06	6.58436e+08
		0.0148	0	1	5	4		1.66667e+06	8.33333e+06	5e+06	3.37838e+08
		0.01	0		5	4		2.33333e+07	8.33333e+06	1.58333e+07	1.58333e+09	7.13715e+08
		0.0082	1	2	0	3	166667	333333		250000	3.04878e+07
		0.0131	-	9		4		15000000	2.16667e+07	1.83333e+07	1.39949e+09
		0.0083	-	-	6	3			1000000	1000000	1.20482e+08
		0.0115	3	-	-	4	5000000			5000000	4.34783e+08
		0.0058	3	-	-	4	5000000			5000000	8.62069e+08	6.83991e+08
		0.0083	2	4	4	4	3.33333e+06	6.66667e+06	6.66667e+06	5.55556e+06	6.69344e+08
		0.0119	1	1	2	4	1.66667e+06	1.66667e+06	3.33333e+06	2.22222e+06	1.86741e+08
		0.0138	2	5	6	4	3.33333e+06	8.33333e+06	10000000	7.22222e+06	5.23349e+08
		0.0099	0	7	7	4		1.16667e+07	1.16667e+07	1.16667e+07	1.17845e+09
		0.009	2	0	1	4	3.33333e+06		1.66667e+06	2.5e+06	2.77778e+08	6.68906e+08
		0.0072	2	1	7	4	3.33333e+06	1.66667e+06	1.16667e+07	5.55556e+06	7.71605e+08
		0.0081	5	0	0	4	8.33333e+06			8.33333e+06	1.02881e+09
		0.0357	-	8	8	4		1.33333e+07	1.33333e+07	1.33333e+07	3.73483e+08
		0.0084	1	3	-	4	1.66667e+06	1.33333e+07		7.5e+06	8.92857e+08
	Treatment	Weight (g)	Count	count	count	dilution	cfu/ml 1	cfu/ml 2	cfu/ml 3	Average	AVG/weight	AVG/Plate	Average	STD
	Plant MS(1/2) + 50uM CuSO4	0.0069	13	12	11	4	2.16667e+07	20000000	1.83333e+07	2e+07	2.89855e+09	2.98011e+09	1.80479e+09	7.46912e+07
		0.0078	x	x	x	x
		0.0079	5	6	5	4	8.33333e+06	10000000	8.33333e+06	8.88889e+06	1.12518e+09
		0.005	1	2	4	3	166667	333333	666667	388889	7.77778e+07
		0.0027	15	15	8	4	25000000	25000000	1.33333e+07	2.11111e+07	7.81893e+09
		0.0048	17	4	15	3	2.83333e+06	666667	2500000	2e+06	4.16667e+08
		0.0093	x	x	x	x
		0.0094	8	11	5	3	1.33333e+06	1.83333e+06	833333	1.33333e+06	1.41844e+08
		0.0122	9	5	5	3	1500000	833333	833333	1.05556e+06	8.65209e+07
		0.009	4	3	5	3	666667	500000	833333	666667	7.40741e+07
		0.0099	11	12	x	5	1.83333e+08	200000000		1.91667e+08		2.30657e+09
		0.0122	11	12	13	5	1.83333e+08	200000000	2.16667e+08	200000000
		0.0105	19	15	12	3	3.16667e+06	2500000	2000000	2.55556e+06	2.43386e+08
		0.0192	2	2	3	4	3.33333e+06	3.33333e+06	1.33333e+07	6.66667e+06	3.47222e+08
		0.0316	15	10	11	5	250000000	1.66667e+08	1.83333e+08	200000000	6.32911e+09
		0.0203	1	1	2	4	1.66667e+06	1.66667e+06	3.33333e+06	2.22222e+06	1.09469e+08	1.86347e+09
		0.0144	1	1	3	4	1.66667e+06	1.66667e+06	5000000	2.77778e+06	1.92901e+08
		0.0087	5	5	5	4	8.33333e+06	8.33333e+06	8.33333e+06	8.33333e+06	9.57854e+08
		0.0125	6	6	-	5	100000000	100000000		100000000	8e+09
		0.0107	3	3	5	3	500000	500000	833333	611111	5.71132e+07
	Treatment	Weight (g)	Count	count	count	dilution	cfu/ml 1	cfu/ml 2	cfu/ml 3	Average	AVG/weight	AVG/Plate	Average	STD
	Rhizosphere MS(1/2)	0.7356	-	12	-	4		20000000		20000000	2.71887e+07	1.24082e+07	1.01393e+07	8.53433e+06
		0.7317	-	3	6	4		1.66667e+06	10000000	5.83333e+06	7.9723e+06
		0.6398	2	6	0	4	3.33333e+06	10000000		6.66667e+06	1.04199e+07
		0.617	0	1	2	4		1.66667e+06	3.33333e+06	2.5e+06	4.05186e+06
		0.7659	3	8	-	4	5000000	1.33333e+07		9.16667e+06	1.19685e+07	5.5186e+06
		0.5325	7	8	5	4ta,3ra,3ra	3.33333e+06	1.33333e+06	833333	1.83333e+06	3.44288e+06
		0.4369	3	1	5	3	500000	166667	833333	500000	1.14443e+06
		0.3468	2	0	1	3	333333		166667	250000
		0.3301	1	0	0	4	166667			166667	504897	1.1336e+07
		0.2737	0	3	0	4		5000000		5000000	1.82682e+07
		0.251	5	3	1	4	8.33333e+06	5000000	1.66667e+06	5e+06	1.99203e+07
		0.2506	1	0	0	4	1.66667e+06			1.66667e+06	6.6507e+06
		0.1923
		0.236
		0.2449
		0.2568
		0.1893
		0.2069
		0.1707
		0.1923
	Treatment	Weight	Count	count	count	dilution	cfu/ml 1	cfu/ml 2	cfu/ml 3	Average	AVG/weight	AVG/Plate	Average	STD
	Rhizosphere MS(1/2) + 50 uM CuSO4	0.4041	6	6	4	3	1000000	1000000	666667	888889	2.19968e+06	2.26377e+06	1.37725e+06	1.14597e+06
		0.4063	3	3	2	3	500000	500000	333333	444444	1.09388e+06
		0.4544	4	1	2	3	666667	166667	333333	388889	855829
		0.2371	20	9	6	2	3.33333e+06	150000	100000	1.19444e+06	5.03772e+06
		0.4691	7	4	7	3	1.16667e+06	666667	1.16667e+06	1e+06	2.13174e+06
		0.4251	14	12	4	2	233333	200000	66666.6	166667		931139
		0.4262	10	13	-	2	166667	216667		191667	449710
		0.4093	3	5	6	3	500000	833333	1000000	777778	1.90026e+06
		0.3025	1	1	3	3	166667	166667	500000	277778	918273
		0.3896	10	10	12	2	166667	166667	200000	177778	456308
		0.4698	16	13	11	3	266667	216667	1.83333e+06	772222	1.64373e+06	1.06113e+06
		0.2838	7	0	9	2	166667		150000	158333	557905
		0.3951	2	3	6	3	333333	500000	1000000	611111	1.54673e+06
		0.3359	8	12	7	2	133333	200000	166667	166667	496179
		0.4258	7	7	8	2	166667	166667	133333	155556
		0.4605	9	8	5	2	150000	133333	83333.3	122222		916003
		0.4365	16	11	13	2	266667	183333	216667	222222	509100
		0.423	4	4	2	3	666667	666667	333333	555556	1.31337e+06
		0.2401	1	1	2	3	166667	166667	333333	222222	925540
		0.3906	6	7	10	2	100000	116667	166667	127778
		Tube Weight (g)	Tube+Agar Weigth	Full-Empty	c1	c2	c3	Average C	Average/agar	Average/Weight	Average	STDEV
	Non Rhizosphere MS(1/2)	0.9959	1.182	0.1861	1666.67	1166.67	1666.67	1500	8060.18	6262.43	16781.1	11130.5
		0.0727	1.1926	1.1199	3333.33	8333.33	3333.33	5000	4464.68
		0.9764	1.1305	0.1541	1666.67	3333.33	1166.67	2055.55	13339.1	14760.2
		0.9867	1.1412	0.1545	3333.33	1666.67		2500	16181.2
		0.9837	1.1909	0.2072	1666.67	1666.67	3333.33	2222.22	10725	15557.8
		0.9811	1.1364	0.1553	1333.33	5000		3166.66	20390.6
		0.9953	1.201	0.2057	11666.7	11666.7	1666.67	8333.33	40512.1	30544.1
		0.9822	1.1982	0.216	6666.67	3333.33	3333.33	4444.44	20576.1
		Tube Weight (g)	Tube+Agar Weigth	Full-Empty	c1	c2	c3	Average C	Average/agar	Average/Weight	Average	STDEV
	Non Rhizosphere MS(1/2) + 50uM CuSO4	0.9771	1.1484	0.1713	5000	8333.33	16666.7	10000	58377.1	51845.8	36130.5	13428.9
		0.9824	1.1663	0.1839	5000	3333.33	16666.7	8333.33	45314.5
		0.9767	1.129	0.1523	1166.67	1166.67	16666.7	6333.33	41584.6	32223.5
		0.9856	1.1314	0.1458	1666.67	6666.67	1666.67	3333.33	22862.4
		0.9841	1.1653	0.1812	1666.67	6666.67	11666.7	6666.67	36791.8	29915.1
		0.9899	1.1587	0.1688	6666.67	3333.33	1666.67	3888.89	23038.4
		0.9869	1.1428	0.1559	5000	5000	1666.67	3888.89	24944.8	24567.2
		0.9819	1.1197	0.1378	3333.33	3333.33	3333.33	3333.33	24189.6

## Sheet: Statistical Analysis 
	Replicates	Plant MS(1/2)	Plant MS(1/2) + 50µM CuSO4	P Value
	1	7.33025e+07	2.89855e+09	0.110624
	2	9.57854e+07	1.12518e+09			Test F for two samples variance				Test T for two samples assuming unequal variance
	3	5.37634e+07	7.77778e+07
	4	6.58436e+08	7.81893e+09				Variable 1	Variable 2			Variable 1	Variable 2
	5	3.37838e+08	4.16667e+08			Media	1.80479e+09	5.77609e+08		Media	1.80479e+09	5.77609e+08
	6	1.58333e+09	1.41844e+08			Variance	8.27382e+18	2.1678e+17		Variance	8.27382e+18	2.1678e+17
	7	3.04878e+07	8.65209e+07			Observations	16	20		Observations	16	20
	8	1.39949e+09	7.40741e+07			Freedom degrees	15	19		Hypothetical means difference	0
	9	1.20482e+08	2.43386e+08			F	38.1669			Freedom degree	16
	10	4.34783e+08	3.47222e+08			P(F<=f) one tail	5.31524e-11			T- statistics	1.68892
	11	8.62069e+08	6.32911e+09			Critical value fro F (one tail)	2.23406			P(T<=t) one tail	0.0553118
	12	6.69344e+08	1.09469e+08							Critical value for T (one tail)	1.74588
	13	1.86741e+08	1.92901e+08							P(T<=t) two tails	0.110624
	14	5.23349e+08	9.57854e+08							Critical value for T (two tails)	2.11991
	15	1.17845e+09	8e+09
	16	2.77778e+08	5.71132e+07
	17	7.71605e+08
	18	1.02881e+09
	19	3.73483e+08
	20	8.92857e+08
	Repliques	Rhizosphere MS(1/2)	Rhizosphere MS(1/2) + 50 uM CuSO4	P Value
	1	2.71887e+07	2.19968e+06	0.00695302		Test F for two samples variance				Test T for two samples assuming unequal variance
	2	7.9723e+06	1.09388e+06
	3	1.04199e+07	855829				Variable 1	Variable 2			Variable 1	Variable 2
	4	4.05186e+06	5.03772e+06			Media	1.01393e+07	1.37725e+06		Media	1.01393e+07	1.37725e+06
	5	1.19685e+07	2.13174e+06			Variance	7.28348e+13	1.31325e+12		Variance	7.28348e+13	1.31325e+12
	6	3.44288e+06	449710			Observations	11	16		Observations	11	16
	7	1.14443e+06	1.90026e+06			Freedom degrees	10	15		Hypothetical means difference	0
	8	504897	918273			F	55.4616			Freedom degree	10
	9	1.82682e+07	456308			P(F<=f) one tail	5.27007e-10			T- statistics	3.38423
	10	1.99203e+07	1.64373e+06			Critical value fro F (one tail)	2.54372			P(T<=t) one tail	0.00347651
	11	6.6507e+06	557905							Critical value for T (one tail)	1.81246
	12		1.54673e+06							P(T<=t) two tails	0.00695302
	13		496179							Critical value for T (two tails)	2.22814
	14		509100
	15		1.31337e+06
	16		925540
	17
	18
	19
	20
	Repliques	Non Rhizosphere MS(1/2)	Non Rhizosphere MS(1/2) + 50uM CuSO4	P Value		Test F for two samples variance				Test T for two samples assuming unequal variance
	1	8060.18	58377.1	0.0108803
	2	4464.68	45314.5				Variable 1	Variable 2			Variable 1	Variable 2
	3	13339.1	41584.6			Media	34637.9	16781.1		Media	16781.1	34637.9
	4	16181.2	22862.4			Variance	1.72396e+08	1.23889e+08		Variance	1.23889e+08	1.72396e+08
	5	10725	36791.8			Observations	8	8		Observations	8	8
	6	20390.6	23038.4			Freedom degrees	7	7		Hypothetical means difference	0
	7	40512.1	24944.8			F	1.39153			Freedom degree	14
	8	20576.1	24189.6			P(F<=f) one tail	0.33692			T- statistics	-2.93422
						Critical value fro F (one tail)	3.78704			P(T<=t) one tail	0.00544015
										Critical value for T (one tail)	1.76131
										P(T<=t) two tails	0.0108803
										Critical value for T (two tails)	2.14479
